# Supplementary material
Source: PubMed Central journal article supplement (PMC10184284)

# Alpha-1-antitrypsin and its variant-dependent role in COVID-19 pathogenesis

Christian S Stevens<sup>1#</sup>, Kasopefoluwa Y Oguntuyo<sup>1#</sup>, Shreyas Kowdle<sup>1</sup>, Luca Brambilla<sup>1</sup>, Griffin Haas<sup>1</sup>, Aditya Gowlikar<sup>1</sup>, Mohammed NA Siddiquey<sup>2</sup>, Robert M Schilke<sup>2</sup>, Matthew D Woolard<sup>2</sup>, Hongbo Zhang<sup>2</sup>, Joshua A Acklin<sup>1</sup>, Satoshi Ikegame<sup>1</sup>, Chuan-Tien Huang<sup>1</sup>, Jean K Lim<sup>1</sup>, Robert W Cross<sup>3</sup>, Thomas W Geisbert<sup>3</sup>, Stanimir S Ivanov<sup>2</sup>, Jeremy P Kamil<sup>2</sup>, the Alpha-1 Foundation<sup>4</sup>, and Benhur Lee<sup>1</sup>

Supplementary Figures

**A.**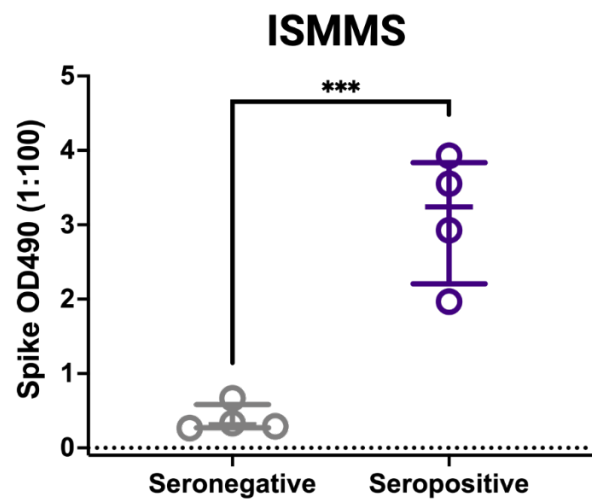**B.**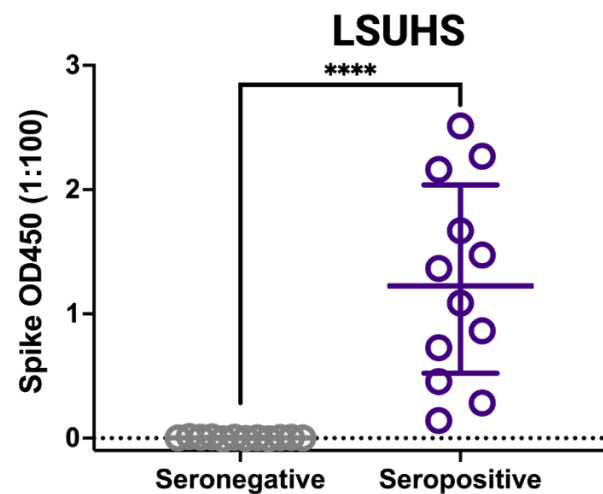**C.**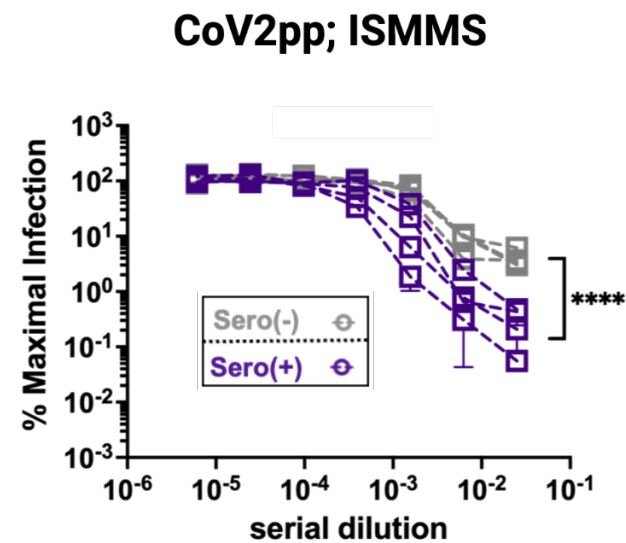**D.**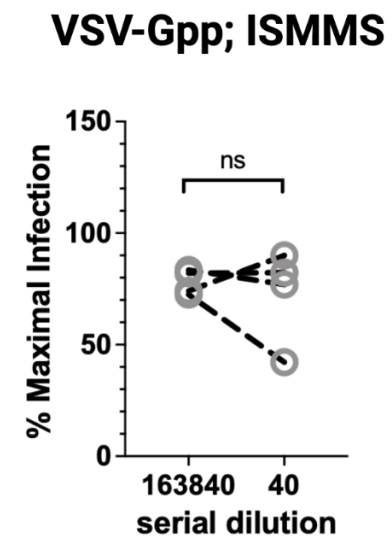**E.**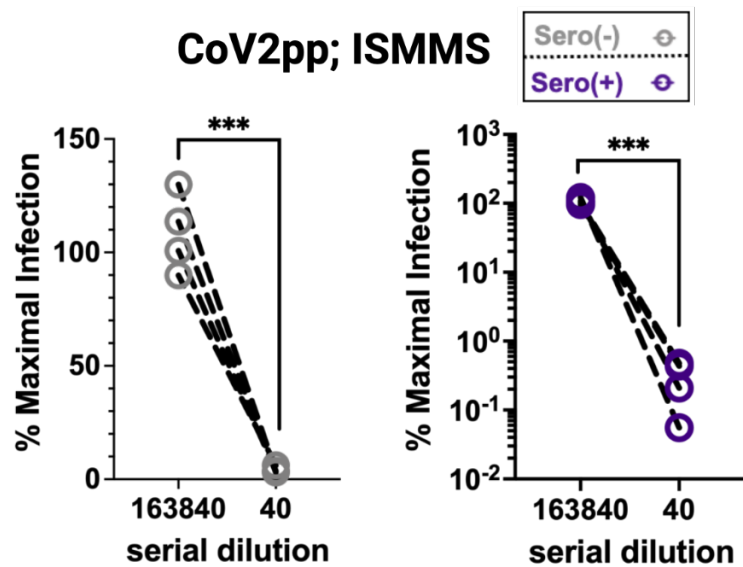**F.**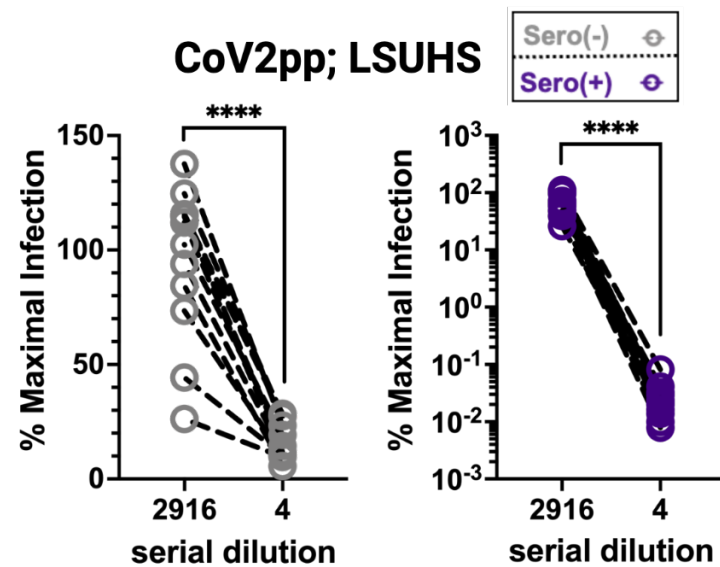**G.**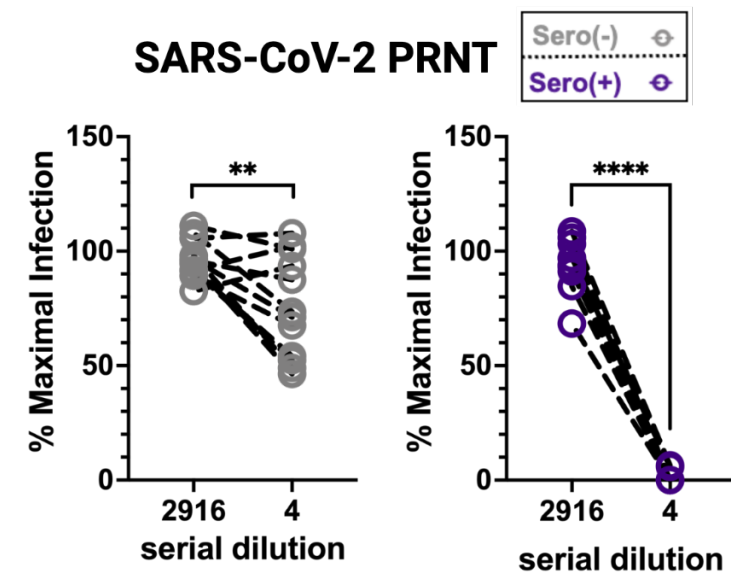

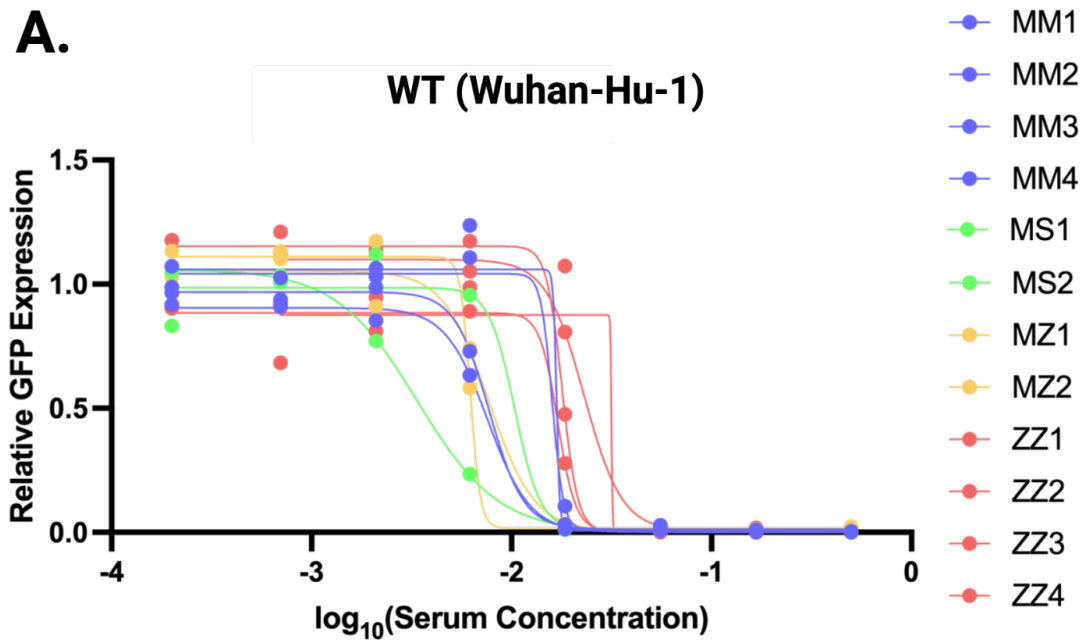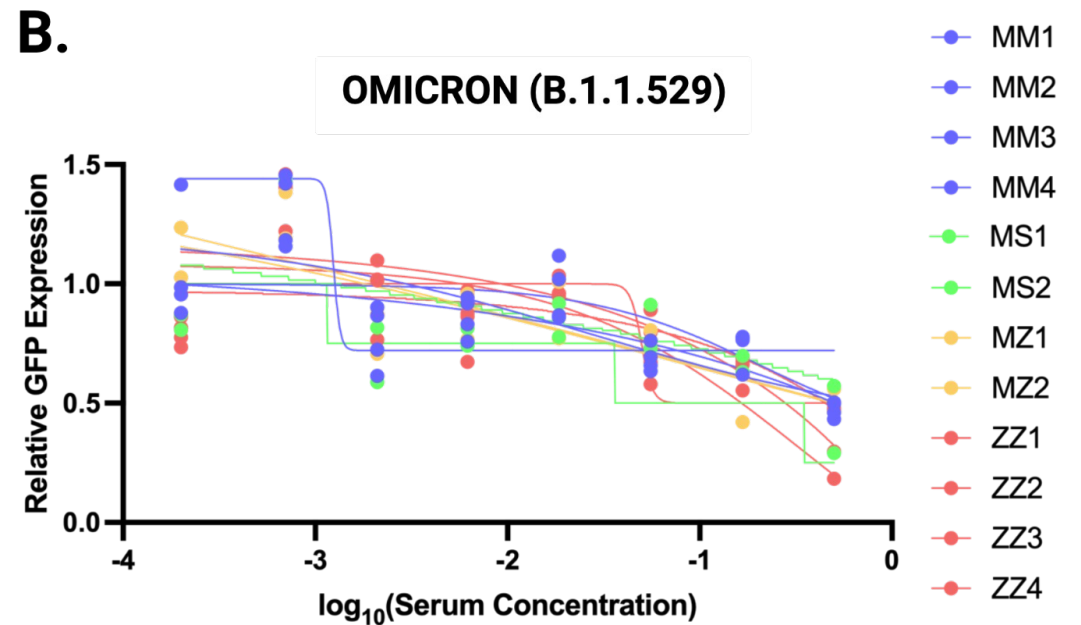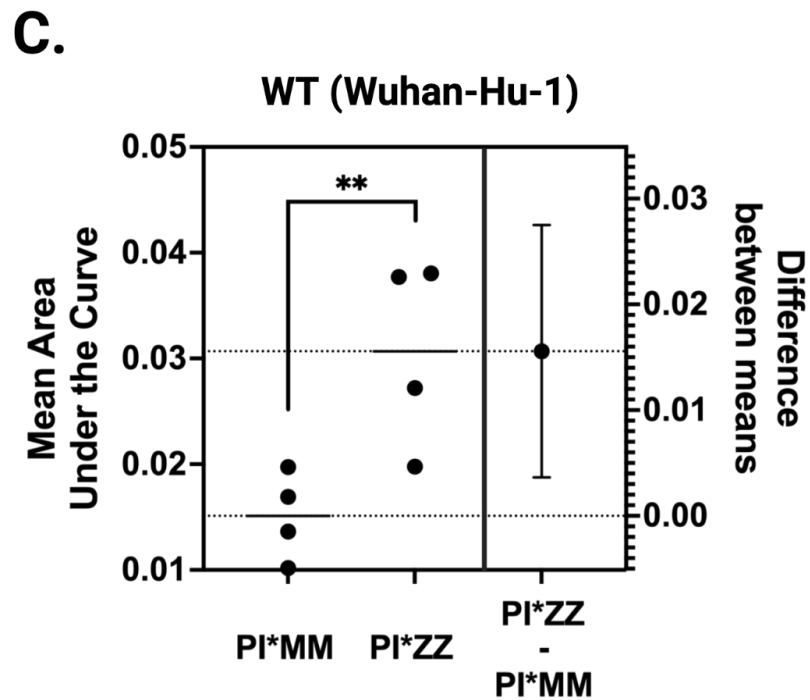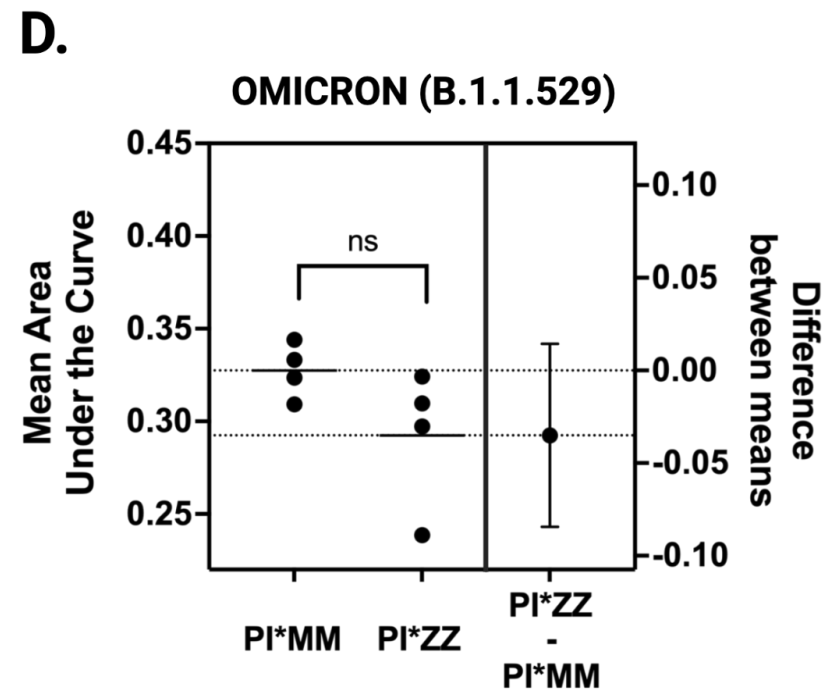

Supplement: media-1.pdf [file media-1.pdf]
